# Supplementary material
Source: HighWire-hosted journal article supplement (https://qdcxjkg.com/highwire/filestream/113096/field_highwire_adjunct_files/2/Online_data_supplement_Table_S1.pdf)
Supplement: Online_data_supplement_Table_S1.pdf [file Online_data_supplement_Table_S1.pdf]

Online data supplement Table S1

Results of multivariate linear regression analysis performed to predict voluntary cough flow rate from NIHSS score (stroke severity score), height and FEV<sub>1</sub>/FVC ratio.

Model Summary

| Model | R                 | R Square | Adjusted R Square | Std. Error of the Estimate |
|-------|-------------------|----------|-------------------|----------------------------|
| 1     | .830 <sup>a</sup> | .689     | .653              | 109.246                    |

a. Predictors: (Constant), FEV<sub>1</sub>/FVC ratio, Height(cm), NIHSS score

Coefficients<sup>a</sup>

| Model |                             | Unstandardized Coefficients |            | Standardized Coefficients | t      | Sig. | 95.0% Confidence Interval for B |             |
|-------|-----------------------------|-----------------------------|------------|---------------------------|--------|------|---------------------------------|-------------|
|       |                             | B                           | Std. Error | Beta                      |        |      | Lower Bound                     | Upper Bound |
| 1     | (Constant)                  | -873.029                    | 444.351    |                           | -1.965 | .060 | -1786.406                       | 40.347      |
|       | NIHSS score                 | -12.646                     | 3.167      | -.525                     | -3.993 | .000 | -19.155                         | -6.136      |
|       | Height (cm)                 | 5.669                       | 2.334      | .278                      | 2.429  | .022 | .871                            | 10.467      |
|       | FEV <sub>1</sub> /FVC ratio | 5.143                       | 2.341      | .279                      | 2.197  | .037 | .330                            | 9.956       |

a. Dependent Variable: Voluntary cough flow rate (l/min)
